# Supplementary material
Source: MDPI journal article supplement (https://www.mdpi.com/1999-4907/10/3/243)
Supplement: s1 [file s1]

## Supplementary Materials

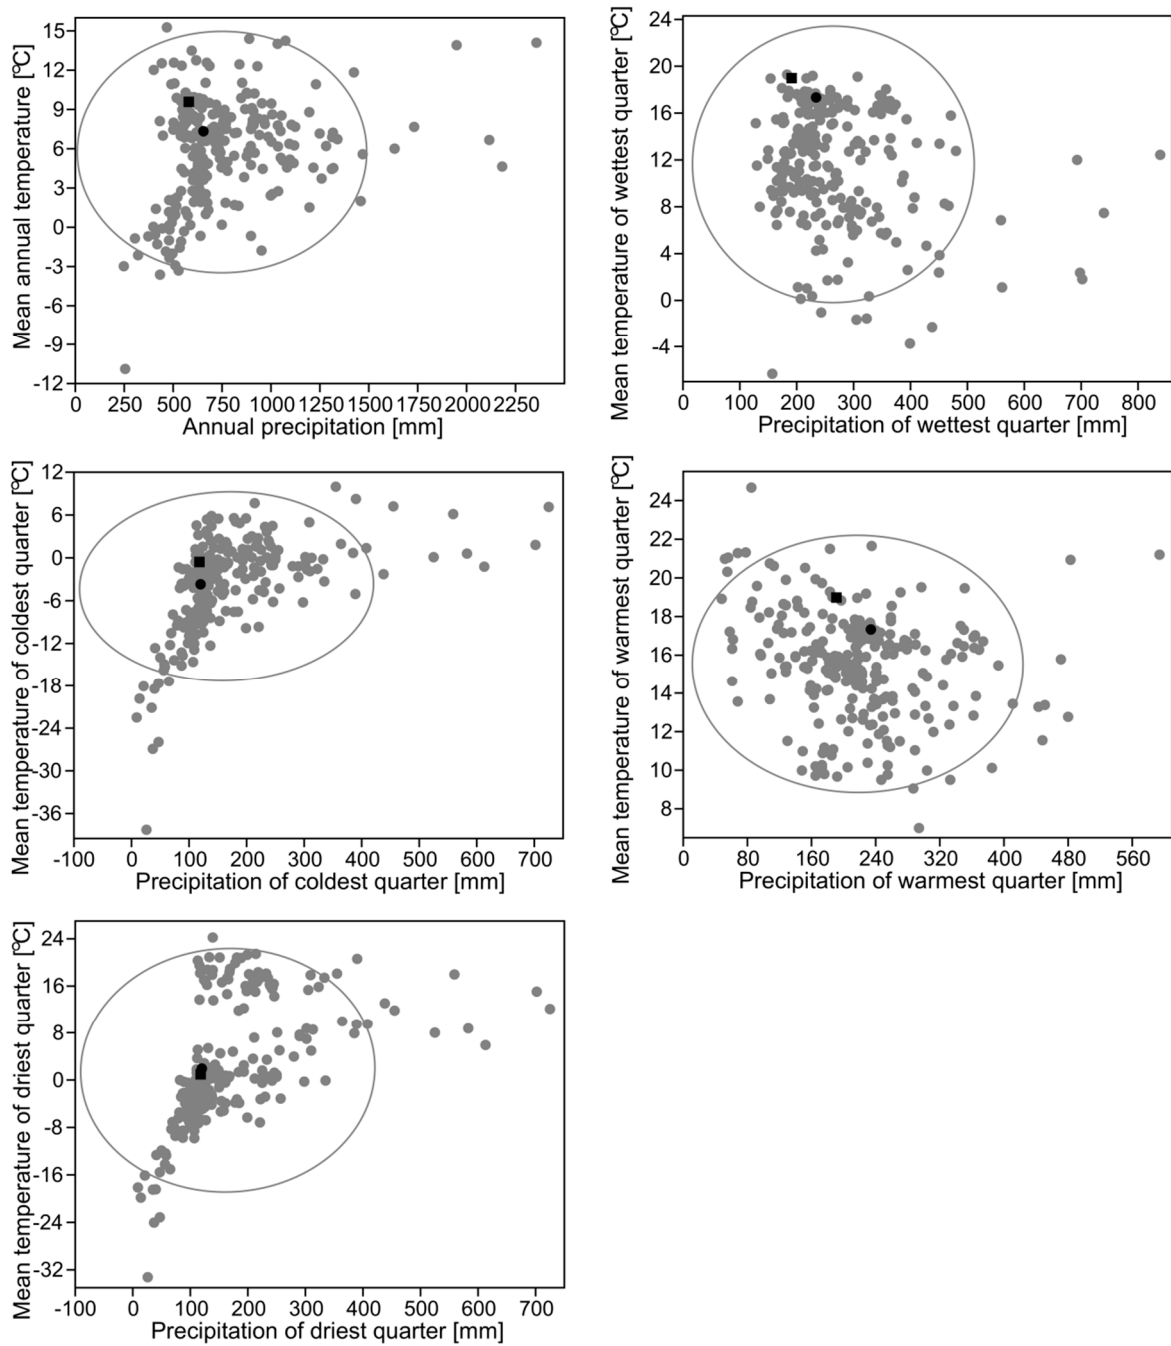

Figure S1. Comparative analysis of the most limiting BIOCLIM (Hijmans et al. 2005) values: black square – Fenyőfő; black dot – Tabórz; grey dots – 273 localities from all distribution range of *P. sylvestris ssp. sylvestris* taken from *Conifers of the World* database [25]. Elipses indicate 95% variability of climatic values for all sampling sites.

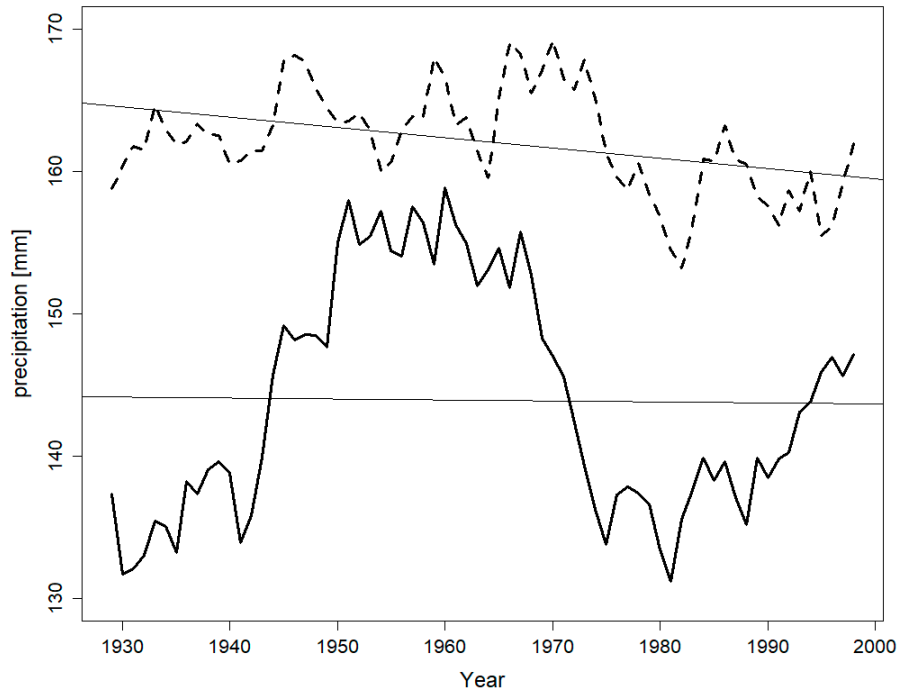

Figure S2. Changes in the sum of precipitation from June to July at Fenyőfő (solid line) and the Mazury Lakeland (dashed line). The mean correlation ( $r$ ) between sites is 0.46 ( $P < 0.05$ ).

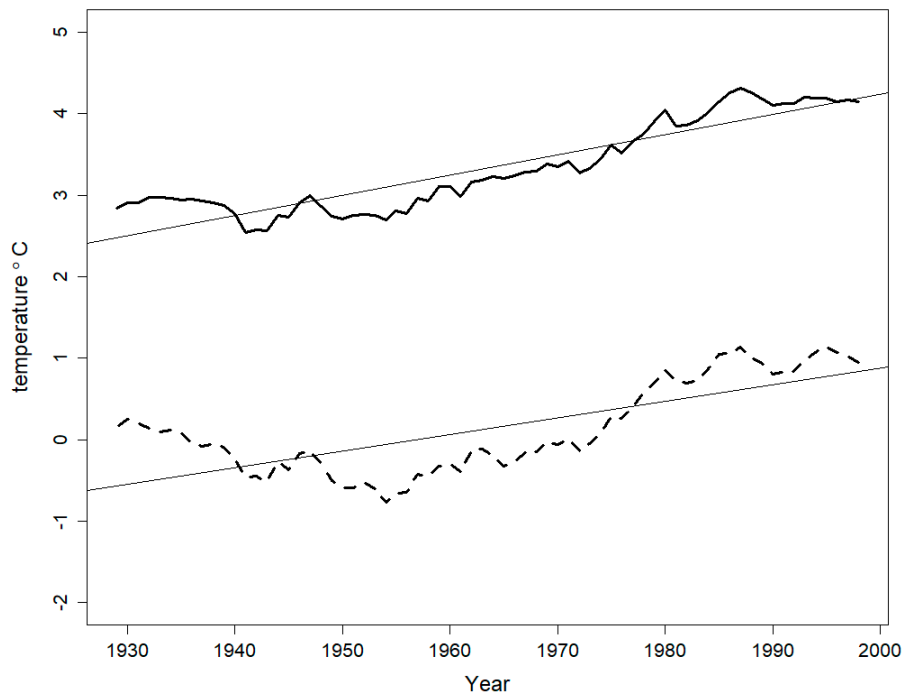

Figure S3. Changes in the mean of temperature from February to March at Fenyőfő (solid line) and the Mazury Lakeland (dashed line). The mean correlation ( $r$ ) between sites is 0.93 ( $P < 0.05$ ).
